# Supplementary material for: Nurse-Led Oral Health Education for Head and Neck Cancer Patients on Radiotherapy: A Systematic Review and Meta-Analysis
Source: Research Square preprint supplement (doi:10.21203/rs.3.rs-8582333/v1), 2026-01-29
Supplement: Supplementary file 1 [file 7aa0ceb126aa059e8d4982a2.docx]

**Detailed search strategy**

| **Database** | **Search strings** | **Number of articles** |
| --- | --- | --- |
| **PubMed** | ("Head and Neck Neoplasms"[MeSH] OR "head and neck cancer"[Title/Abstract] OR "head and neck tumor"[Title/Abstract] OR "head and neck carcinoma"[Title/Abstract]) AND ("Health Education"[MeSH] OR "health education"[Title/Abstract] OR "patient education"[Title/Abstract] OR "health promotion"[Title/Abstract] OR "health training[Title/Abstract]") AND ("Oral Hygiene"[MeSH] OR "oral care"[Title/Abstract] OR "dental care"[Title/Abstract] OR "mouth care"[Title/Abstract] OR "oral hygiene"[Title/Abstract]) | **70** |
| **Embase** | head:ab,ti AND 'neck cancer':ab,ti AND ('health education':ab,ti OR 'patient education':ab,ti OR 'health promotion':ab,ti OR 'health training':ab,ti) AND ('oral health':ab,ti OR 'oral care':ab,ti OR 'dental care':ab,ti OR 'mouth care':ab,ti OR 'oral hygiene':ab,ti) | **29** |
| **Cochrane** | (Head and Neck Neoplasms):ti,ab,kw AND (Health Education):ti,ab,kw AND (Oral Hygiene):ti,ab,kw | **9** |
| **Web of Science** | TS=("head and neck cancer" OR "head and neck tumor" OR "head and neck carcinoma")  AND  TS=("health education" OR "patient education" OR "health promotion")  AND  TS=("oral care" OR "dental care" OR "mouth care" OR "oral hygiene") | **9** |
| **OVID** | (("head and neck neoplasms" or "head and neck cancer" or "head and neck tumor" or "head and neck carcinoma") and ("health education" or "patient education" or "health promotion" or "health training") and ("oral hygiene" or "oral care" or "dental care" or "mouth care" or "oral hygiene")) | **71** |
| **CNKI** | （主题：头颈癌 + 头颈部肿瘤 + 头颈部恶性肿瘤 + 鼻咽癌）AND（主题：健康教育 + 患者教育 + 健康促进 + 护理宣教 + 健康宣教）AND（主题：口腔健康 + 口腔卫生 + 口腔保健 + 牙齿健康 + 牙健康 + 口腔） | **183** |
| **WANFANG** | 主题:(头颈癌 OR 头颈部肿瘤 OR 头颈部恶性肿瘤 OR 鼻咽癌) and 主题:(健康教育 OR 患者教育 OR 健康促进 OR 护理宣教 OR 健康宣教) and 主题:(口腔健康 OR 口腔卫生 OR 口腔保健 OR 牙齿健康 OR 牙健康 OR 口腔) | **208** |
| **Total** |  | **579** |
